# Supplementary material for: Three-Phase Coexistence in Lipid Membranes
Source: PubMed Central journal article supplement (PMC5266263; doi:10.1016/j.bpj.2016.12.025), 2017-01-24
Supplement: mmc1.pdf [file mmc1.pdf]

**Biophysical Journal, Volume 112**

**Supplemental Information**

**Three-Phase Coexistence in Lipid Membranes**

**Anders Aufderhorst-Roberts, Udayan Chandra, and Simon D. Connell**

## Supplementary Information

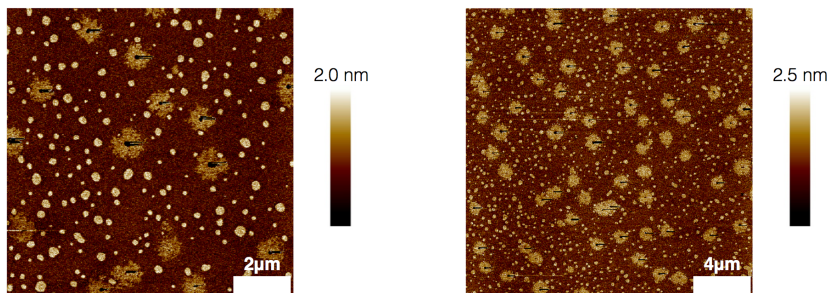

Figure S1: Contact mode AFM image of composition (F) formed at a slower cooling rate of  $0.4^{\circ}\text{C}/\text{min}$  at two different scan sizes. Domains are approximately round and evenly distributed suggesting cooling through the binodal with domain formation via a nucleation and growth mechanism.  $l_{\alpha}$  domains appear homogeneous while  $l_{\beta}$  domains appear to collapse in their centre demonstrating variable domain compressibility caused by domains being out of equilibrium.

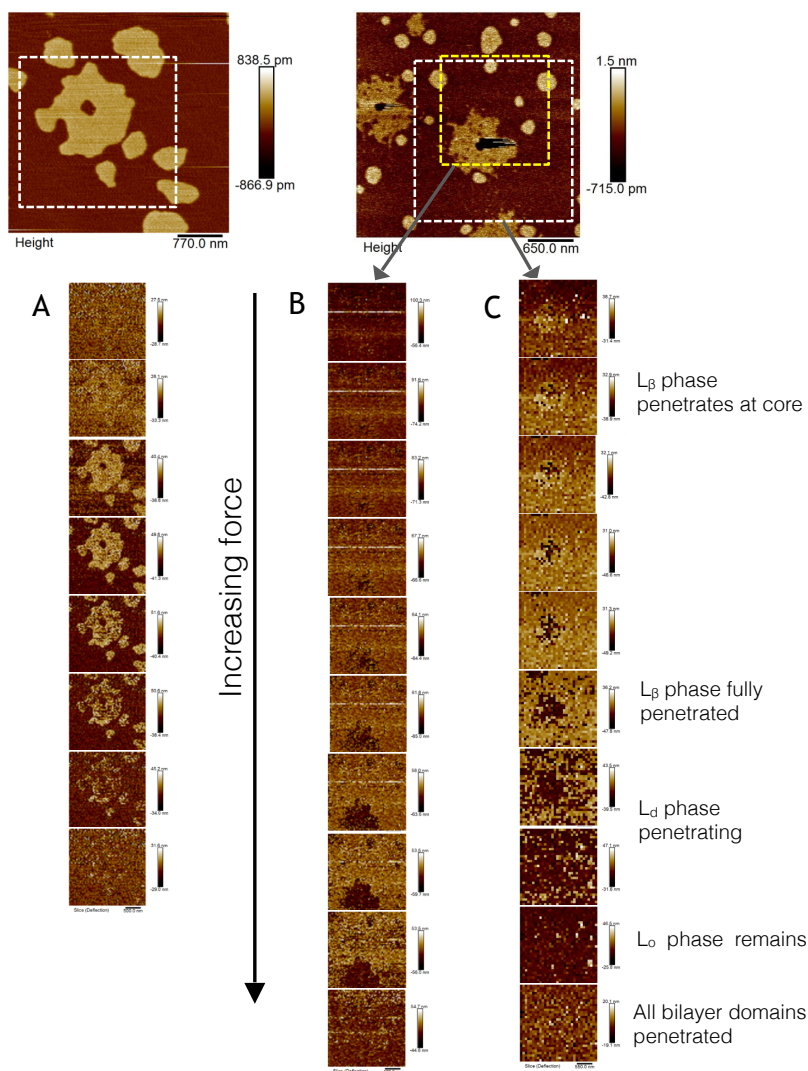

Figure S2: Sequential ‘slices’ at increasing force through force volume mode AFM of three phase images as shown in the heat maps of figure 3, together with standard resolution images of the same area. Sequence A shows large  $l_o$  domains only. Three coexisting phases are shown in B and C. In sequence B the maximum force was not set high enough to penetrate the  $l_o$  phase. Maximum applied force was increased in the lower resolution Sequence C to capture the  $l_o$  penetration event.

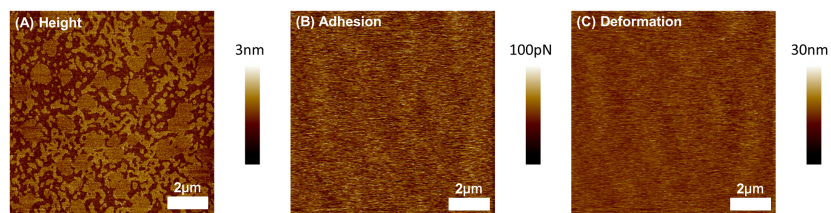

Figure S3: Peak force QNM atomic force micrograph showing the height profile of a phospholipid bilayer formed from composition E. Three phases can be seen, a background  $l_d$  phase, a spinodal  $l_o$  phase and a circular  $l_\beta$  phase. Both adhesion (B) and deformation (C) as measured by QNM are found to be negligible.

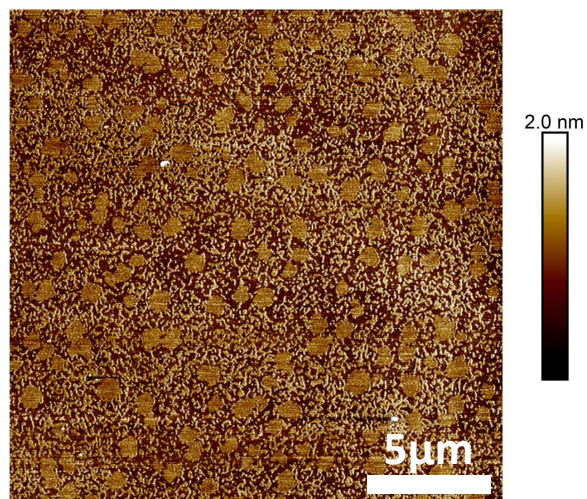

Figure S4: Peak force QNM atomic force micrograph showing the height profile of a phospholipid bilayer formed from composition E over a larger area:  $20\mu\text{m}$
